# Supplementary material for: The Association between Ambient Air Pollution and Allergic Rhinitis: Further Epidemiological Evidence from Changchun, Northeastern China
Source: MDPI journal article supplement (doi:10.3390/ijerph14030226), 2017-02-23
Supplement: s1 [file s1]

**Table S1.** Age distribution and gender of AR outpatients in Changchun.

| <b>Age</b> | <b>Male</b> | <b>Female</b> | <b>Total</b> | <b>Proportion of<br/>age group%</b> |
|------------|-------------|---------------|--------------|-------------------------------------|
| <10        | 1796        | 947           | 2743         | 11.75                               |
| 10-19      | 2209        | 1152          | 3362         | 14.40                               |
| 20-29      | 2354        | 2037          | 4391         | 18.81                               |
| 30-39      | 2230        | 2322          | 4552         | 19.50                               |
| 40-49      | 1682        | 2186          | 3868         | 16.57                               |
| 50-59      | 1145        | 1407          | 2551         | 10.93                               |
| 60-69      | 570         | 602           | 1172         | 5.02                                |
| ≥70        | 480         | 225           | 705          | 3.02                                |
| Total      | 12,466      | 10,878        | 23,344       | 100.00                              |
