# Supplementary material for: The Association between Ambient Air Pollution and Allergic Rhinitis: Further Epidemiological Evidence from Changchun, Northeastern China
Source: MDPI journal article supplement (doi:10.3390/ijerph14030226), 2017-02-23
Supplement: s1 [file s1]

| No. | Reference                                                                                                                                                                                                                                   |
|-----|---------------------------------------------------------------------------------------------------------------------------------------------------------------------------------------------------------------------------------------------|
| 1   | Chen P C, Lai Y M, Wang J D, et al. Adverse effect of air pollution on respiratory health of primary school children in Taiwan[J]. <i>Environmental Health Perspectives</i> , 1998, 106(6): 331.                                            |
| 2   | Han Y and Zhang H. Epidemiological investigation of allergic rhinitis in the primary school students in grade three of Shihezi city[J]. <i>Journal of clinical otorhinolaryngology, head, and neck surgery</i> , 2009, 23(23): 1074-1078.   |
| 3   | Huang C, Liu W, Hu Y, et al. Updated prevalences of asthma, allergy, and airway symptoms, and a systematic review of trends over time for childhood asthma in Shanghai, China[J]. <i>PloS one</i> , 2015, 10(4): e0121577.                  |
| 4   | Hwang C Y, Chen Y J, Lin M W, et al. Prevalence of atopic dermatitis, allergic rhinitis and asthma in Taiwan: a national study 2000 to 2007[J]. <i>Acta dermato-venereologica</i> , 2010, 90(6): 589-594.                                   |
| 5   | Jiang M, Wang Q, Li Z, et al. The questionnaire survey of children allergic rhinitis in Nanjing [J]. <i>Chinese Archives of Otolaryngology-Head and Neck Surgery</i> , 2006, 2: 015.                                                        |
| 6   | Kao C C, Huang J L, Ou L et al. The prevalence, severity and seasonal variations of asthma, rhinitis and eczema in Taiwanese schoolchildren[J]. <i>Pediatric Allergy and Immunology</i> , 2005, 16: 408-415.                                |
| 7   | Katellaris C H, Lai C K W, Rhee C S, et al. Nasal allergies in the Asian - Pacific population: Results from the Allergies in Asia - Pacific Survey[J]. <i>American journal of rhinology &amp; allergy</i> , 2011, 25(Supplement 1): S3-S15. |
| 8   | Kong W J, Chen J J, Zheng Z Y, et al. Prevalence of allergic rhinitis in 3-6 - year - old children in Wuhan of China[J]. <i>Clinical &amp; Experimental Allergy</i> , 2009, 39(6): 869-874.                                                 |
| 9   | Lau Y L, Karlberg J. Prevalence and risk factors of childhood asthma, rhinitis and eczema in Hong Kong[J]. <i>Journal of paediatrics and child health</i> , 1998, 34(1): 47-52.                                                             |
| 10  | Lee Y L, Shaw C K, Su H J, et al. Climate, traffic-related air pollutants and allergic rhinitis prevalence in middle-school children in Taiwan[J]. <i>European Respiratory Journal</i> , 2003, 21(6): 964-970.                              |
| 11  | Leung R, Ho P. Asthma, allergy, and atopy in three south-east Asian populations[J]. <i>Thorax</i> , 1994, 49(12): 1205-1210.                                                                                                                |
| 12  | Li A, Sun Y, Liu Z, et al. The influence of home environmental factors and life style on children's respiratory health in Xi'an[J]. <i>Chinese Science Bulletin</i> , 2014, 59(17): 2024-2030.                                              |
| 13  | Li C W, Chen D H, Zhong J T, et al. Epidemiological characterization and risk factors of allergic rhinitis in the general population in guangzhou city in China[J]. <i>PloS one</i> , 2014, 9(12): e114950.                                 |
| 14  | Li F, Zhou Y, Li S, et al. Prevalence and risk factors of childhood allergic diseases in eight metropolitan cities in China: a multicenter study[J]. <i>BMC public health</i> , 2011, 11(1): 1.                                             |
| 15  | Liao P F, Sun H L, Lu K H, et al. Prevalence of childhood allergic diseases in central Taiwan over the past 15 years[J]. <i>Pediatrics &amp; Neonatology</i> , 2009, 50(1): 18-25.                                                          |
| 16  | Liu M M, Wang D, Zhao Y, et al. Effects of outdoor and indoor air pollution on respiratory health of Chinese children from 50 kindergartens[J]. <i>Journal of Epidemiology</i> , 2013, 23(4): 280-287.                                      |
| 17  | Lu C, Deng Q H, Ou C Y, et al. Effects of ambient air pollution on allergic rhinitis among preschool children in Changsha, China[J]. <i>Chinese Science Bulletin</i> , 2013, 58(34): 4252-4258.                                             |
| 18  | Ma Y, Zhao J, Han Z R, et al. Very low prevalence of asthma and allergies in schoolchildren from rural Beijing, China[J]. <i>Pediatric pulmonology</i> , 2009, 44(8): 793-799.                                                              |
| 19  | Qian D, Hong S, Yang Y, et al. Survey on epidemiological features of allergic rhinitis in western areas of China [J]. <i>Acta Academiae Medicinae Militaris Tertiae</i> , 2008, 6: 030.                                                     |
| 20  | Song N, Mohammed S, Zhang J, et al. Prevalence, severity and risk factors of asthma, rhinitis and eczema in a large group of Chinese schoolchildren[J]. <i>Journal of Asthma</i> , 2014, 51(3): 232-242.                                    |
| 21  | Wang T T, Zhao Z H, Yao H, et al. Housing characteristics and indoor environment in relation to children's asthma, allergic diseases and pneumonia in Urumqi, China[J]. <i>Chinese Science Bulletin</i> , 2013, 58(34): 4237-4244.          |
| 22  | Zhang L, Han D, Huang D, et al. Prevalence of self-reported allergic rhinitis in eleven major cities in china[J]. <i>International archives of allergy and immunology</i> , 2009, 149(1): 47-57.                                            |
| 23  | Zhang Y M, Zhang J, Liu S L, et al. Prevalence and associated risk factors of allergic rhinitis in preschool children in Beijing[J]. <i>The Laryngoscope</i> , 2013, 123(1): 28-35.                                                         |
| 24  | Zhang Y P, Li B Z, Huang C, et al. Ten cities cross-sectional questionnaire survey of children asthma and other allergies in China[J]. <i>Chinese Science Bulletin</i> , 2013, 58(34): 4182-4189.                                           |
| 25  | Zhao J, Bai J, Shen K, et al. Self-reported prevalence of childhood allergic diseases in three cities of China: a multicenter study[J]. <i>BMC public health</i> , 2010, 10(1): 551.                                                        |
| 26  | Zhao T B, Wang A J, Chen Y Z, et al. Prevalence of childhood asthma, allergic rhinitis and eczema in Urumqi and Beijing[J]. <i>Journal of paediatrics and child health</i> , 2000, 36(2): 128-133.                                          |
